# Supplementary material for: Bacteriocin-Nanoconjugates (Bac10307-AgNPs) Biosynthesized from Lactobacillus acidophilus-Derived Bacteriocins Exhibit Enhanced and Promising Biological Activities
Source: MDPI journal article supplement (doi:10.3390/pharmaceutics15020403), 2023-01-25
Supplement: s1 [file s1]

**Table S1: Interacting active site residues of other bacteriocins with different target proteins.**

| Protein                | Receptor-Ligand            | Interection Type           | Distance |
|------------------------|----------------------------|----------------------------|----------|
| <b>2CDU-Acidocin B</b> | A:ALA300:HN - A:GLN7:OE1   | Conventional Hydrogen Bond | 2.6848   |
|                        | A:THR301:HN - A:GLN7:OE1   | Conventional Hydrogen Bond | 1.95499  |
|                        | A:ARG305:HE - A:ALA57:O    | Conventional Hydrogen Bond | 3.04807  |
|                        | A:ARG305:HH21 - A:TYR2:O   | Conventional Hydrogen Bond | 2.03629  |
|                        | A:ARG305:HH22 - A:ALA57:O  | Conventional Hydrogen Bond | 1.84058  |
|                        | A:TRP3:HE1 - A:SER327:O    | Conventional Hydrogen Bond | 1.94698  |
|                        | A:TRP45:HE1 - A:TYR435:OH  | Conventional Hydrogen Bond | 1.97034  |
|                        | A:PRO43:CD - A:ASP397:O    | Carbon Hydrogen Bond       | 3.0818   |
|                        | A:ALA44:CB - A:PHE429      | Pi-Sigma                   | 3.67554  |
|                        | A:ALA48 - A:LEU424         | Alkyl                      | 4.73006  |
|                        | A:ALA49 - A:VAL404         | Alkyl                      | 4.13372  |
|                        | A:ALA52 - A:VAL421         | Alkyl                      | 4.72078  |
|                        | A:ALA55 - A:VAL404         | Alkyl                      | 4.72187  |
|                        | A:HIS396 - A:PRO43         | Pi-Alkyl                   | 5.4283   |
|                        | A:TRP45 - A:VAL404         | Pi-Alkyl                   | 4.80352  |
|                        | A:TRP45 - A:MET423         | Pi-Alkyl                   | 4.53761  |
|                        | A:TRP45 - A:LEU436         | Pi-Alkyl                   | 5.17648  |
|                        |                            |                            |          |
| <b>2CDU-Lactacin F</b> | A:ARG305:HH11 - A:ALA33:O  | Conventional Hydrogen Bond | 2.01119  |
|                        | A:ARG305:HH21 - A:ALA33:O  | Conventional Hydrogen Bond | 1.83044  |
|                        | A:ARG308:HH11 - A:ASN25:O  | Conventional Hydrogen Bond | 1.7866   |
|                        | A:ARG308:HH11 - A:VAL26:O  | Conventional Hydrogen Bond | 2.19157  |
|                        | A:ARG308:HH21 - A:ASN25:O  | Conventional Hydrogen Bond | 1.91878  |
|                        | A:LYS331:HN - A:CYS44:O    | Conventional Hydrogen Bond | 1.97064  |
|                        | A:THR38:HG1 - A:GLN400:OE1 | Conventional Hydrogen Bond | 1.92953  |
|                        | A:THR42:HG1 - A:SER399:OG  | Conventional Hydrogen Bond | 1.92953  |
|                        | A:ALA47:HN - A:GLU163:OE2  | Conventional Hydrogen Bond | 2.09852  |
|                        | A:TYR55:HH - A:LEU60:O     | Conventional Hydrogen Bond | 2.14601  |
|                        | A:LYS75:HZ1 - A:LEU71:O    | Conventional Hydrogen Bond | 1.72707  |
|                        | A:PRO46:CD - A:GLU163:OE2  | Carbon Hydrogen Bond       | 3.30143  |
|                        | A:HIS54:CE1 - A:HIS10:O    | Carbon Hydrogen Bond       | 3.05448  |
|                        | A:LYS318:NZ - A:TRP22      | Pi-Cation                  | 4.82835  |
|                        | A:VAL304:CG1 - A:HIS54     | Pi-Sigma                   | 3.70403  |
|                        | A:HIS54 - A:PHE14          | Pi-Pi Stacked              | 5.07033  |
|                        | A:HIS54 - A:TYR62          | Pi-Pi Stacked              | 4.07917  |

|                        |                        |                            |         |
|------------------------|------------------------|----------------------------|---------|
|                        | A:TYR62 - A:TYR55      | Pi-Pi T-shaped             | 5.93686 |
|                        | A:PRO24 - A:LYS75      | Alkyl                      | 5.42808 |
|                        | A:ALA300 - A:VAL50     | Alkyl                      | 3.6542  |
|                        | A:ALA300 - A:ALA53     | Alkyl                      | 4.47499 |
|                        | A:VAL319 - A:VAL26     | Alkyl                      | 4.64205 |
|                        | A:VAL26 - A:LEU312     | Alkyl                      | 5.01538 |
|                        | A:ALA33 - A:VAL304     | Alkyl                      | 4.81276 |
|                        | A:CYS44 - A:LEU46      | Alkyl                      | 3.93851 |
|                        | A:PRO46 - A:LEU330     | Alkyl                      | 4.84717 |
|                        | A:ALA47 - A:LEU46      | Alkyl                      | 4.53793 |
|                        | A:CYS48 - A:LEU46      | Alkyl                      | 5.26647 |
|                        | A:VAL50 - A:LEU40      | Alkyl                      | 4.47585 |
|                        | A:ALA51 - A:LEU40      | Alkyl                      | 4.53413 |
|                        | A:ALA53 - A:VAL304     | Alkyl                      | 4.28383 |
|                        | A:ARG74 - A:PRO24      | Alkyl                      | 5.31453 |
|                        | A:HIS10 - A:VAL50      | Pi-Alkyl                   | 5.04111 |
|                        | A:PHE14 - A:PRO57      | Pi-Alkyl                   | 5.47587 |
|                        | A:TYR159 - A:PRO46     | Pi-Alkyl                   | 5.27588 |
|                        | A:TRP22 - A:LYS318     | Pi-Alkyl                   | 5.08696 |
|                        | A:TRP22 - A:LEU312     | Pi-Alkyl                   | 5.09244 |
|                        | A:TRP22 - A:LYS318     | Pi-Alkyl                   | 5.08696 |
|                        | A:TYR55 - A:LEU40      | Pi-Alkyl                   | 5.28065 |
|                        | A:PHE70 - A:ALA21      | Pi-Alkyl                   | 5.09262 |
|                        |                        |                            |         |
| <b>6F86-Acidocin B</b> | A:ALA35:HN - A:GLY31:O | Conventional Hydrogen Bond | 1.98751 |
|                        | A:LEU38:HN - A:PHE34:O | Conventional Hydrogen Bond | 1.91498 |
|                        | A:GLY39:HN - A:ALA35:O | Conventional Hydrogen Bond | 1.91582 |
|                        | A:THR41:HN - A:LEU38:O | Conventional Hydrogen Bond | 1.85722 |
|                        | A:LEU42:HN - A:LEU38:O | Conventional Hydrogen Bond | 2.1844  |
|                        | A:LEU47:HN - A:ALA44:O | Conventional Hydrogen Bond | 2.81403 |
|                        | A:ALA50:HN - A:ALA46:O | Conventional Hydrogen Bond | 1.87334 |
|                        | A:ALA50:HN - A:LEU47:O | Conventional Hydrogen Bond | 3.08033 |
|                        | A:GLY51:HN - A:LEU47:O | Conventional Hydrogen Bond | 2.04725 |
|                        | A:LEU53:HN - A:ALA50:O | Conventional Hydrogen Bond | 2.09438 |
|                        | A:LEU38:CD1 - A:PHE34  | Pi-Sigma                   | 3.65395 |
|                        | A:ALA35 - A:LEU47      | Alkyl                      | 4.5237  |
|                        | A:LEU38 - A:LEU42      | Alkyl                      | 5.38259 |
|                        | A:LEU38 - A:LEU47      | Alkyl                      | 5.23316 |
|                        | A:ALA44 - A:VAL97      | Alkyl                      | 4.71877 |
|                        | A:ALA46 - A:LEU38      | Alkyl                      | 4.37241 |
|                        | A:ALA50 - A:ALA55      | Alkyl                      | 4.18352 |

|                        |                             |                            |         |
|------------------------|-----------------------------|----------------------------|---------|
|                        |                             |                            |         |
| <b>6F86-Lactacin F</b> | A:ARG19:HE - A:GLY69:O      | Conventional Hydrogen Bond | 2.10922 |
|                        | A:ASN20:HN - A:GLY69:O      | Conventional Hydrogen Bond | 1.90757 |
|                        | A:TRP60:HN - A:LEU56:O      | Conventional Hydrogen Bond | 1.96599 |
|                        | A:TRP60:HN - A:PRO57:O      | Conventional Hydrogen Bond | 2.48877 |
|                        | A:TRP60:HE1 - A:ASN25:O     | Conventional Hydrogen Bond | 2.0821  |
|                        | A:THR64:HN - A:TRP60:O      | Conventional Hydrogen Bond | 2.47824 |
|                        | A:THR64:HG1 - A:TRP60:O     | Conventional Hydrogen Bond | 1.82616 |
|                        | A:GLY69:HN - A:THR64:O      | Conventional Hydrogen Bond | 2.31259 |
|                        | A:GLY69:HN - A:THR67:OG1    | Conventional Hydrogen Bond | 2.76059 |
|                        | A:PHE70:HN - A:THR64:O      | Conventional Hydrogen Bond | 1.95649 |
|                        | A:ARG76:NH1 - A:PHE70       | Pi-Cation                  | 3.99269 |
|                        | A:TRP60 - A:ALA29           | Pi-Alkyl                   | 4.99947 |
|                        |                             |                            |         |
| <b>2OH4-Acidocin B</b> | A:ARG1025:NH1 - A:ASP6:OD2  | Attractive Charge          | 4.73116 |
|                        | A:ARG1025:NH2 - A:ASP6:OD1  | Attractive Charge          | 2.70258 |
|                        | A:SER875:HG - A:GLY9:O      | Conventional Hydrogen Bond | 3.04026 |
|                        | A:SER875:HG - A:ILE10:O     | Conventional Hydrogen Bond | 1.81591 |
|                        | A:ARG878:HH11 - A:PHE8:O    | Conventional Hydrogen Bond | 1.7208  |
|                        | A:ARG878:HH21 - A:PHE8:O    | Conventional Hydrogen Bond | 2.44669 |
|                        | A:ARG878:HH21 - A:GLY9:O    | Conventional Hydrogen Bond | 1.79364 |
|                        | A:SER882:HG - A:GLN7:O      | Conventional Hydrogen Bond | 2.83692 |
|                        | A:ARG1025:HE - A:ASP6:OD2   | Conventional Hydrogen Bond | 1.96183 |
|                        | A:ARG1025:HH11 - A:GLN7:OE1 | Conventional Hydrogen Bond | 1.90993 |
|                        | A:ARG1025:HH21 - A:GLN7:OE1 | Conventional Hydrogen Bond | 2.08051 |
|                        | A:LEU1067:HN - A:GLY54:O    | Conventional Hydrogen Bond | 2.018   |
|                        | A:TYR1080:HH - A:THR56:O    | Conventional Hydrogen Bond | 2.26105 |
|                        | A:TRP45:HE1 - A:ILE1051:O   | Conventional Hydrogen Bond | 2.54243 |
|                        | A:ARG1078:CD - A:TYR2:OH    | Carbon Hydrogen Bond       | 3.17524 |
|                        | A:ASP1044:OD2 - A:TRP3      | Pi-Anion                   | 3.8465  |
|                        | A:ASP1044:OD2 - A:TRP3      | Pi-Anion                   | 3.82295 |
|                        | A:ILE10:CG2 - A:PHE843      | Pi-Sigma                   | 3.76951 |
|                        | A:TYR1080 - A:TYR2          | Pi-Pi Stacked              | 5.11477 |
|                        | A:ALA879 - A:ILE10          | Alkyl                      | 3.84682 |
|                        | A:ILE1051 - A:LEU42         | Alkyl                      | 4.49357 |
|                        | A:LEU1065 - A:LEU53         | Alkyl                      | 4.85705 |
|                        | A:ALA46 - A:ILE1051         | Alkyl                      | 4.84307 |
|                        | A:ALA55 - A:PRO1066         | Alkyl                      | 4.53957 |
|                        | A:ALA57 - A:PRO1066         | Alkyl                      | 4.87975 |
|                        | A:ALA57 - A:MET1070         | Alkyl                      | 4.50432 |
|                        | A:PHE8 - A:ALA879           | Pi-Alkyl                   | 5.24374 |

|                        |                             |                            |         |
|------------------------|-----------------------------|----------------------------|---------|
|                        |                             |                            |         |
| <b>2OH4-Lactacin F</b> | A:ARG817:HH12 - A:ALA65:O   | Conventional Hydrogen Bond | 2.60681 |
|                        | A:ALA842:HN - A:TYR55:OH    | Conventional Hydrogen Bond | 2.52066 |
|                        | A:ARG878:HH11 - A:ILE58:O   | Conventional Hydrogen Bond | 2.93861 |
|                        | A:ARG878:HH11 - A:THR61:OG1 | Conventional Hydrogen Bond | 1.74232 |
|                        | A:ARG878:HH21 - A:ILE58:O   | Conventional Hydrogen Bond | 1.7248  |
|                        | A:LYS1021:HZ3 - A:GLN23:OE1 | Conventional Hydrogen Bond | 1.65013 |
|                        | A:ARG1025:HH22 - A:VAL26:O  | Conventional Hydrogen Bond | 1.94758 |
|                        | A:TRP22:HE1 - A:LYS1021:O   | Conventional Hydrogen Bond | 1.9774  |
|                        | A:ASN25:HD21 - A:HIS814:NE2 | Conventional Hydrogen Bond | 2.19207 |
|                        | A:TYR55:HH - A:LEU1047:O    | Conventional Hydrogen Bond | 1.89231 |
|                        | A:LYS75:HZ3 - A:ARG817:O    | Conventional Hydrogen Bond | 1.68243 |
|                        | A:HIS814:CE1 - A:PHE70:O    | Carbon Hydrogen Bond       | 3.20234 |
|                        | A:MET34:SD - A:THR1074:O    | Sulfur-X                   | 3.20017 |
|                        | A:GLU816:OE2 - A:PHE70      | Pi-Anion                   | 4.38119 |
|                        | A:CYS815:SG - A:PHE70       | Pi-Donor Hydrogen Bond     | 3.77389 |
|                        | A:CYS1022:SG - A:TRP22      | Pi-Sulfur                  | 5.85227 |
|                        | A:ARG817 - A:ILE73          | Alkyl                      | 5.47757 |
|                        | A:LEU818 - A:ILE73          | Alkyl                      | 5.04695 |
|                        | A:PRO819 - A:LYS75          | Alkyl                      | 4.26888 |
|                        | A:ALA879 - A:ILE58          | Alkyl                      | 4.21083 |
|                        | A:ALA1048 - A:VAL50         | Alkyl                      | 5.06157 |
|                        | A:PRO1066 - A:VAL50         | Alkyl                      | 4.93548 |
|                        | A:ARG1078 - A:MET34         | Alkyl                      | 4.39874 |
|                        | A:PRO46 - A:LEU1065         | Alkyl                      | 4.69462 |
|                        | A:ALA49 - A:PRO1066         | Alkyl                      | 4.65588 |
|                        | A:VAL50 - A:ILE1051         | Alkyl                      | 4.76826 |
|                        | A:ALA51 - A:ILE1051         | Alkyl                      | 3.66258 |
|                        | A:PHE843 - A:ILE58          | Pi-Alkyl                   | 5.30278 |
|                        | A:TRP22 - A:LYS1021         | Pi-Alkyl                   | 4.53356 |
|                        | A:HIS54 - A:ALA1048         | Pi-Alkyl                   | 4.58902 |
|                        | A:TYR55 - A:ALA842          | Pi-Alkyl                   | 4.88129 |
|                        | A:TYR55 - A:ALA1048         | Pi-Alkyl                   | 4.38572 |
